# Supplementary material for: Technical note: Improving the Initial Conditions of Hydrological Model with Reanalysis Soil Moisture Data
Source: Copernicus journal article supplement (doi:10.5194/egusphere-2022-452), 2022-07-04
Supplement: Supplementary file [file egusphere-2022-452-AC3-supplement.pdf]

This paper has emphasized the improvement of initial condition of hydrological simulation for many times, but its main work is to make comparison analysis of different given initial conditions. Critically, hydrological simulation without warm-up is misunderstanding. In fact, warm-up and initial conditions given plays different roles in the numerical solution to PDE.

Response:

Thank you for your valuable comments on our work. This work proposed a way to get the initial conditions of the hydrological model from a global reanalysis dataset.

Indeed, we agree with you that the warm-up of the hydrological model is different from the initial conditions given. However, we conducted the experiments which is one of the applications of the proposed methodology to get the variables for the model initial conditions.
